# Supplementary material for: Bioaccessibility and Oxidative Stability of Omega-3 Fatty Acids in Supplements, Sardines and Enriched Eggs Studied Using a Static In Vitro Gastrointestinal Model
Source: MDPI journal article supplement (doi:10.3390/molecules27020415), 2022-01-09
Supplement: s1 [file s1]

## SUPPLEMENTARY MATERIALS

# Bioaccessibility and Oxidative Stability of Omega-3 Fatty Acids in Supplements, Sardines and Enriched Eggs Studied Using a Static In Vitro Gastrointestinal Model

Stylianos Floros <sup>1</sup>, Alexandros Toskas <sup>2</sup>, Evagelia Pasidi <sup>1</sup> and Patroklos Varelzis <sup>1,\*</sup>

<sup>1</sup> Department of Chemical Engineering, Faculty of Engineering, Aristotle University of Thessaloniki, 54124 Thessaloniki, Greece; florstyl@cheng.auth.gr (S.F.); egpasidi@cheng.auth.gr (E.P.)

<sup>2</sup> Petros Androulakis Medical Biology Analytical Laboratories, 57001 Thermi, Greece; alex\_tsk@hotmail.com

\* Correspondence: pkvarelzis@cheng.auth.gr; Tel: +30-231-099-6162

**Table S1.** List of FA detected via GC-FID along with their nomenclature.

| PUFA            | Nomenclature                     | MUFA          | Nomenclature         | SFA   | Nomenclature       |
|-----------------|----------------------------------|---------------|----------------------|-------|--------------------|
| C22:6 n-3 (DHA) | Docosahexaenoic acid             | C24:1         | Nervonic acid        | C24:0 | Lignoceric acid    |
| C22:5 n-3 (DPA) | Docosapentaenoic acid            | C20:1         | Paullinic acid       | C21:0 | Heneicosylic acid  |
| C21:5 n-3       | Heneicosapentaenoate             | C20:1 n-9     | Gondoic acid         | C18:0 | Stearic acid       |
| C20:5 n-3 (EPA) | Eicosapentaenoic acid            | C18:1 trans   | Elaidic acid         | C17:0 | Margaric acid      |
| C20:4 n-3       | Eicosatetraenoic acid            | C18:1 cis n-9 | Oleic acid           | C16:0 | Sat. palmitic acid |
| C20:4 n-6       | Arachidonic acid                 | C18:1 n-7     | Vaccenic acid        | C15:0 | Pentadecylic acid  |
| C20:3 n-3       | A-linoleic acid                  | C17:1         | Heptadecenoic acid   | C14:0 | Myristic acid      |
| C20:3 n-6       | Di-homo- $\gamma$ -linoleic acid | C16:1 n-7     | Palmitoleic acid     | C13:0 | Tridecylic acid    |
| C20:2           | Eicosadenoic acid                | C15:1         | Pentadecenoic acid   | C12:0 | Lauric acid        |
| C18:4 n-3       | Stearidonic acid                 | C14:1         | 7-Tetradecenoic acid | C11:0 | Undecylic acid     |
| C18:3 n-3       | $\alpha$ -linolenic acid         |               |                      | C10:0 | Capric acid        |
| C18:3 n-6       | $\gamma$ -linolenic acid         |               |                      | C8:0  | Caprylic acid      |
| C18:2 cis       | Linoleic acid                    |               |                      | C6:0  | Caproic acid       |
| C18:2 trans     | Linolelaidic acid                |               |                      | C4:0  | Butyric acid       |
| C18:2 cis       | Octadecadienoic acid             |               |                      |       |                    |

Table S2. Concentrations of FA detected via GC-FID.

| Sample | PUFA          | Raw State      | Digested State | MUFA          | Raw State      | Digested State | SFA   | Raw State      | Digested State |
|--------|---------------|----------------|----------------|---------------|----------------|----------------|-------|----------------|----------------|
| B      | C22:6 n-3     | 102,880        | 31,193         | C20:1         | 3,868          | 0              | C18:0 | 16,707         | 7,407          |
| R      | C20:5 n-3     | 137,695        | 49,958         | C18:1 cis n-9 | 1,893          | 740            | C17:0 | 576            | 0              |
| A      | C20:4 n-6     | 17,283         | 5,432          | C18:1 trans   | 740            | 713            | C16:0 | 22,304         | 15,363         |
| N      | C20:3 n-3     | 1,234          | 0              | C17:1         | 1,481          | 932            | C15:0 | 411            | 0              |
| D      | C20:3 n-6     | 17,283         | 5,432          | C16:1         | 576            | 4,004          | C14:0 | 5,102          | 4,471          |
|        | C20:2         | 1,810          | 0              |               |                |                | C10:0 | 1,316          | 383            |
| A      | C18:3 n-6     | 2,798          | 3,621          |               |                |                | C8:0  | 1,728          | 416            |
|        | C18:2 cis     | 7,407          | 3,210          |               |                |                |       |                |                |
|        | <b>TOTAL</b>  | <b>288,390</b> | <b>98,846</b>  |               | <b>8,558</b>   | <b>6,389</b>   |       | <b>48,144</b>  | <b>28,040</b>  |
| B      | C22:6 n-3     | 269,396        | 185,991        | C20:1         | 1,508          | 0              | C18:0 | 49,568         | 33,692         |
| R      | C20:5 n-3     | 58,620         | 43,965         | C18:1 cis n-9 | 84,913         | 58,835         | C17:0 | 1,724          | 1,005          |
| A      | C20:4 n-6     | 22,198         | 15,876         | C16:1         | 862            | 0              | C14:0 | 6,465          | 3,807          |
| N      | C20:3 n-6     | 2,586          | 0              |               |                |                | C12:0 | 1,939          | 1,149          |
| D      | C20:3 n-3     | 1,939          | 0              |               |                |                | C10:0 | 34,482         | 21,838         |
|        | C20:2         | 3,017          | 1,436          |               |                |                | C8:0  | 50,646         | 30,028         |
| B      | C18:3 n-3     | 1,939          | 4,669          |               |                |                | C6:0  | 3,879          | 2,586          |
|        | C18:3 n-6     | 6,250          | 3,520          |               |                |                |       |                |                |
|        | C18:2 trans   | 3,017          | 0              |               |                |                |       |                |                |
|        | C18:2 cis     | 14,439         | 12,643         |               |                |                |       |                |                |
|        | <b>TOTAL</b>  | <b>383,401</b> | <b>268,100</b> |               | <b>87,283</b>  | <b>58,835</b>  |       | <b>148,703</b> | <b>94,105</b>  |
| B      | C22:6 n-3     | 142,982        | 46,858         | C18:1 cis n-9 | 65,570         | 98,537         | C18:0 | 29,824         | 22,952         |
| R      | C20:5 n-3     | 197,368        | 61,695         | C18:1 trans   | 1,096          | 4,020          | C17:0 | 2,850          | 0              |
| A      | C20:4 n-6     | 1,535          | 8,918          | C17:1         | 1,973          | 4,531          | C16:0 | 35,964         | 71,927         |
| N      | C20:3 n-3     | 20,833         | 0              | C16:1         | 17,324         | 15,423         | C14:0 | 7,894          | 22,806         |
| D      | C20:3 n-6     | 2,412          | 0              |               |                |                | C10:0 | 1,535          | 0              |
|        | C20:2         | 2,192          | 0              |               |                |                | C8:0  | 1,754          | 0              |
| C      | C18:3 n-6     | 3,508          | 24,123         |               |                |                |       |                |                |
|        | C18:2 cis     | 10,087         | 149,122        |               |                |                |       |                |                |
|        | <b>TOTAL</b>  | <b>380,917</b> | <b>290,716</b> |               | <b>85,963</b>  | <b>122,511</b> |       | <b>79,821</b>  | <b>117,685</b> |
| B      | C22:5 n-3     | 3,089          | 708            | C20:1 n-9     | 5,506          | 779            | C21:0 | 177            | 0              |
| R      | C21:5 n-3     | 1,242          | 175            | C20:1         | 2,232          | 283            | C18:0 | 4,000          | 583            |
| A      | C20:5 n-3     | 24,991         | 3,817          | C18:1 cis n-9 | 11,633         | 5,629          | C17:0 | 119            | 0              |
| N      | C20:4 n-3     | 2,257          | 296            | C18:1 n-7     | 54,198         | 1,559          | C16:0 | 29,069         | 3,697          |
| D      | C20:4 n-6     | 26,485         | 3,221          | C18:1 trans   | 182            | 87             | C15:0 | 935            | 124            |
|        | C20:3 n-3     | 506            | 71             | C17:1         | 1,511          | 290            | C14:0 | 12,648         | 1,841          |
| D      | C20:3 n-6     | 288            | 0              | C16:1 n-7     | 26,997         | 3,552          | C12:0 | 100            | 0              |
|        | C20:2         | 760            | 136            | C14:1         | 361            | 44             | C10:0 | 355            | 46             |
|        | C18:4 n-3     | 42,269         | 4,523          |               |                |                | C8:0  | 468            | 49             |
|        | C18:3 n-6     | 351            | 66             |               |                |                |       |                |                |
|        | C18:3 n-3     | 0              | 669            |               |                |                |       |                |                |
|        | C18:2 n-4 cis | 4,569          | 631            |               |                |                |       |                |                |
|        | C18:2 n-6     | 828            | 124            |               |                |                |       |                |                |
|        | C18:2 trans   | 1,188          | 0              |               |                |                |       |                |                |
|        | <b>TOTAL</b>  | <b>108,823</b> | <b>14,437</b>  |               | <b>102,620</b> | <b>12,223</b>  |       | <b>47,871</b>  | <b>6,340</b>   |
| F      | C22:6 n-3     | 389            | 93             | C20:1 cis n-9 | 50             | 160            | C18:0 | 186            | 3,840          |
| I      | C20:5 n-3     | 254            | 106            | C18:1 cis n-9 | 68             | 7,960          | C17:0 | 34             | 53             |

|             |               |               |              |               |               |               |       |               |               |
|-------------|---------------|---------------|--------------|---------------|---------------|---------------|-------|---------------|---------------|
| S<br>H      | C20:4 n-6     | 0             | 66           | C18:1 trans   | 1,881         | 786           | C16:0 | 728           | 12,493        |
|             | C20:3 n-6     | 0             | 40           | C18:1 n-7     | 745           | 213           | C15:0 | 33            | 466           |
|             | C18:4 n-3     | 0             | 240          | C17:1         | 0             | 93            | C14:0 | 186           | 4,320         |
|             | C18:3 n-6     | 0             | 40           | C16:1 n-7     | 118           | 253           | C12:0 | 0             | 1,346         |
|             | C18:3 n-3     | 254           | 40           | C14:1         | 0             | 386           | C10:0 | 0             | 1,173         |
|             | C18:2 n-6     | 0             | 80           |               |               |               | C8:0  | 0             | 440           |
|             | C18:2 n-4 cis | 0             | 1,013        |               |               |               | C6:0  | 0             | 640           |
|             | C18:2 trans   | 203           | 26           |               |               |               | C4:0  | 0             | 813           |
|             | <b>TOTAL</b>  | <b>1,100</b>  | <b>1,744</b> |               | <b>2,862</b>  | <b>9,851</b>  |       | <b>1,167</b>  | <b>25,584</b> |
| E<br>G<br>G | C22:6 n-3     | 5,102         | 0            | C20:1         | 0             | 85            | C22:0 | 46            | 0             |
|             | C22:5 n-3     | 100           | 0            | C18:1 n-7     | 1,940         | 378           | C18:0 | 7,980         | 855           |
|             | C21:5 n-3     | 171           | 0            | C18:1 cis n-9 | 40,715        | 8,833         | C17:0 | 184           | 0             |
|             | C20:4 n-6     | 1,715         | 2,013        | C18:1 trans   | 151           | 0             | C16:0 | 23,241        | 2,802         |
|             | C20:3 n-6     | 0             | 143          | C17:1         | 124           | 679           | C14:0 | 22,204        | 13,761        |
|             | C20:2         | 82            | 0            | C16:1 n-7     | 2,497         | 593           | C4:0  | 0             | 4,170         |
|             | C18:4 n-3     | 211           | 0            | C14:1         | 54            | 0             |       |               |               |
|             | C18:3 n-3     | 21            | 579          |               |               |               |       |               |               |
|             | C18:3 n-6     | 0             | 60           |               |               |               |       |               |               |
|             | C18:2 cis n-4 | 16,863        | 3,613        |               |               |               |       |               |               |
|             | C18:2 trans   | 6,838         | 0            |               |               |               |       |               |               |
|             | <b>TOTAL</b>  | <b>31,103</b> | <b>6,408</b> |               | <b>45,481</b> | <b>10,568</b> |       | <b>53,655</b> | <b>21,588</b> |
